# Supplementary material for: Different Azithromycin protocols for management of preterm prelabour rupture of membranes: A randomized clinical trial
Source: Research Square preprint supplement (doi:10.21203/rs.3.rs-1531271/v1), 2022-05-31
Supplement: Supplementary file 1 [file 0871c596bd46f506fa11a4ed.docx]

**Ethical approval**

Ethical approval for this study was obtained from Aswan University Medical Ethical Review Board (IRB: asw/433/1/20).

Clinical trial registration

The study was a single-center, single-blinded randomized, parallel and registered clinical trial (Clinical trial.gov- NCT04202380)

**Informed consent**

Written informed consent was obtained from all subjects before the study.

**Financial support and sponsorship**

No funding source .

**Guarantor**

None

**Conflicts of interest**

There are no conflicts of interest between authors

**Contributorship**:

All authors reviewed and edited the manuscript and approved the final version of the manuscript

**ACKNOWLEDGMENTS**Authors would like to acknowledge to all doctors and
staff of Department of Obstetrics and Gynecology, Aswan University Hospital for their sincere support and help
